# Supplementary material for: Comparative analysis of a bulk optode based on a valinomycin ionophore and a nano-optode in micelles with pluronic F-127 for the quantification of potassium in aqueous solutions
Source: Royal Society of Chemistry journal article supplement (doi:10.1039/d4ay00581c), 2024-01-01
Supplement: d4ay00581c1.pdf [file d4ay00581c1.pdf]

1

## Supplementary information

2 **Comparative analysis of a bulk optode based on a valinomycin ionophore and a**  
3 **nano-optode in micelles with Pluronic F-127 for the quantification of potassium in**  
4 **aqueous solutions.**

5 Miguel Villanueva<sup>a</sup>, Jaime Vega-Chacón<sup>a</sup>, Gino Picasso<sup>a</sup>

6 *Technology of Materials for Environmental Remediation Group (TecMARA), Faculty of Sciences, National*  
7 *University of Engineering, Av. Tupac Amaru 210, Lima 25, Peru*

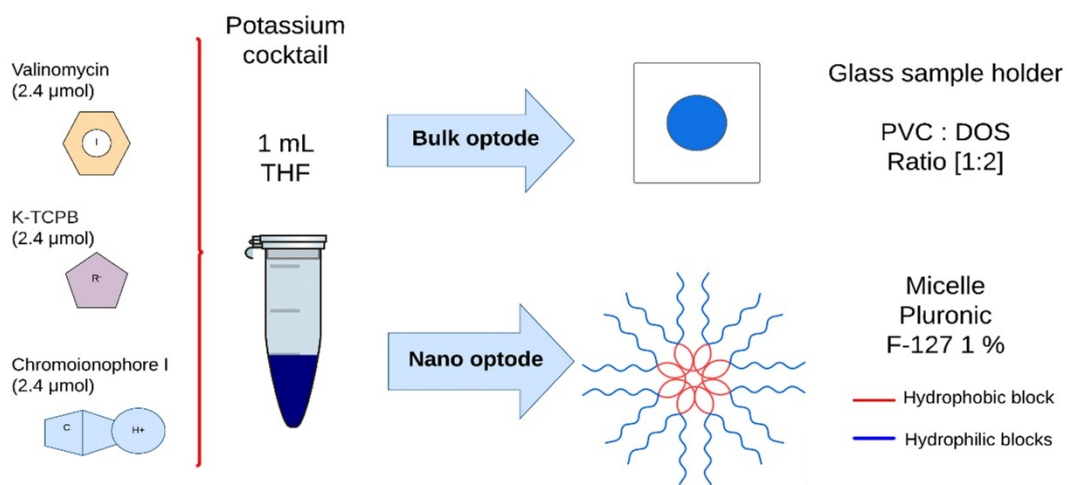

8

9 **Figure S1.** Experimental scheme for the synthesis of BO and NO.

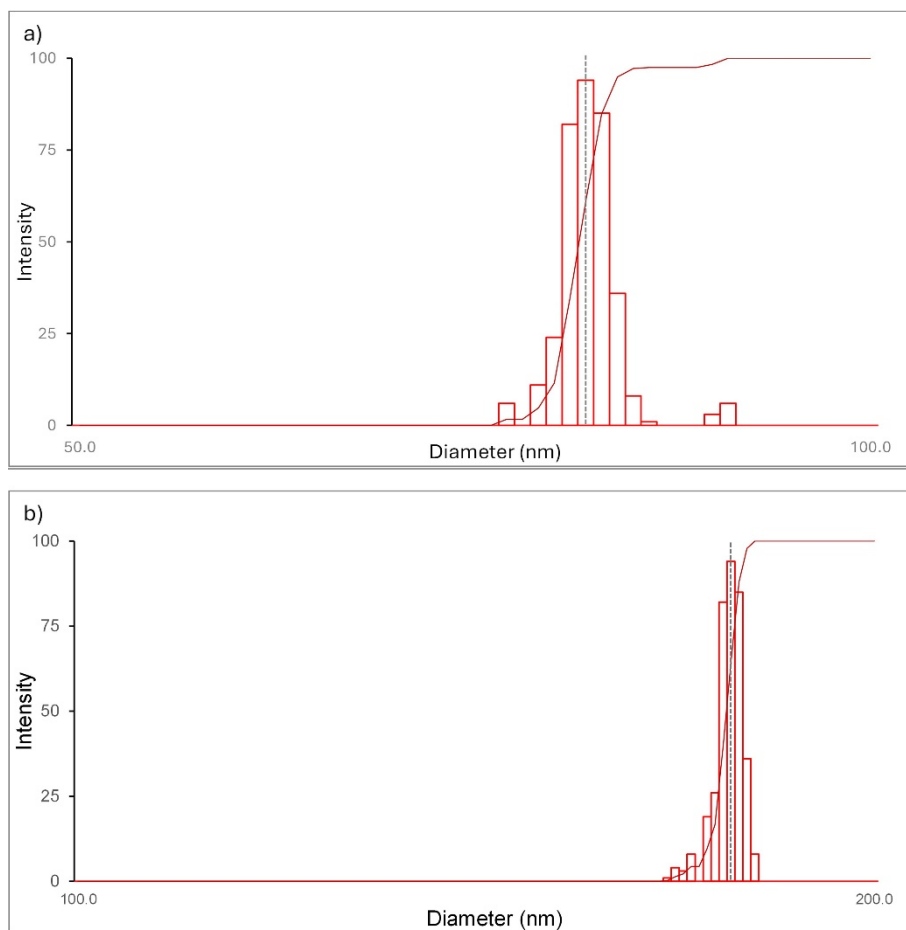

10

11 **Figure S2.** DLS analysis for a) Pluronic F-127 micelles and b) NO micelles.

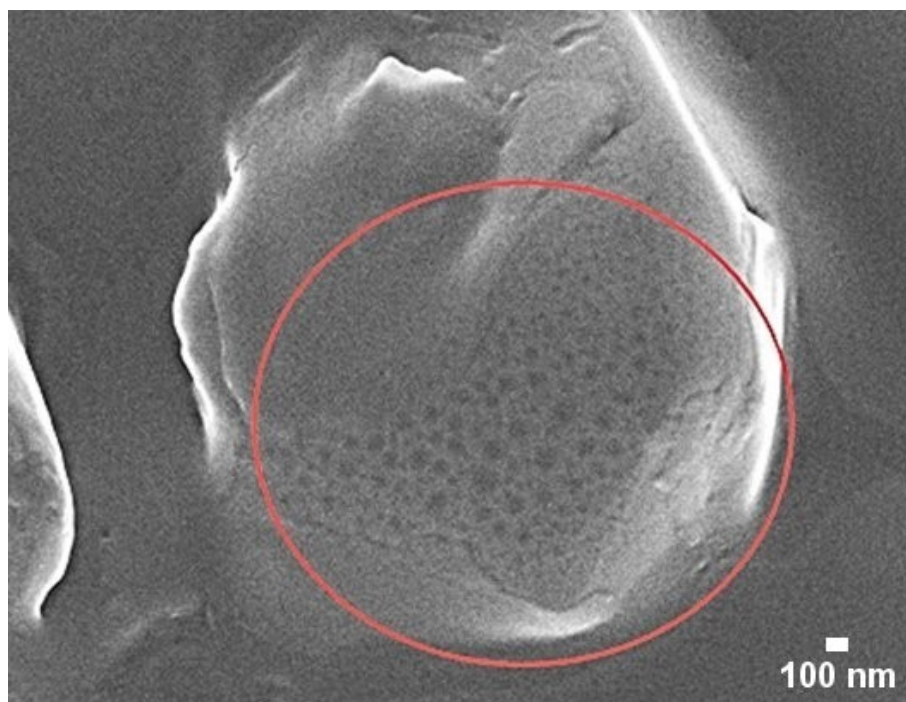

12

13 **Figure S3.** SEM image of NO micelles.

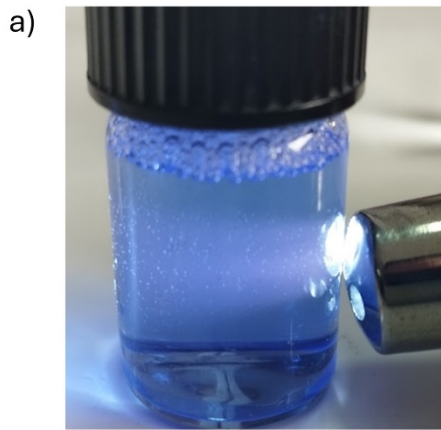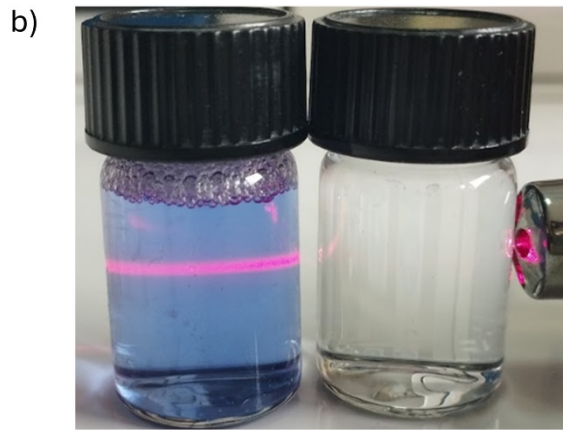

14

15 **Figure S4.** Tyndall effect in NO solutions. a) With a light source present. b) With a laser  
 16 beam present.

17

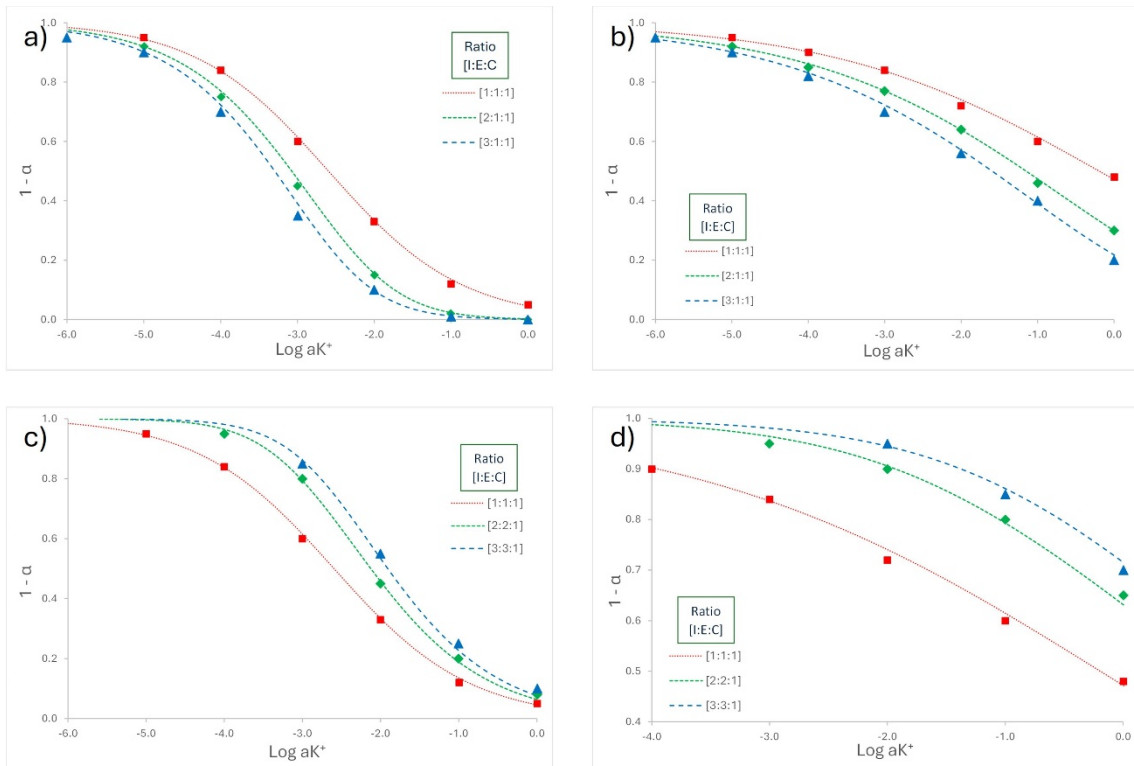

18

19 **Figure S5.** Effect of increasing the ionophore valinomycin on the sigmoid model of (a)  
 20 BO and (b) NO. Effect of increasing the ion exchanger K-TCPB on the sigmoid model of  
 21 (c) BO and (d) NO. Measurements were performed in 20 mM TRIS-HCl buffer pH 7.0.

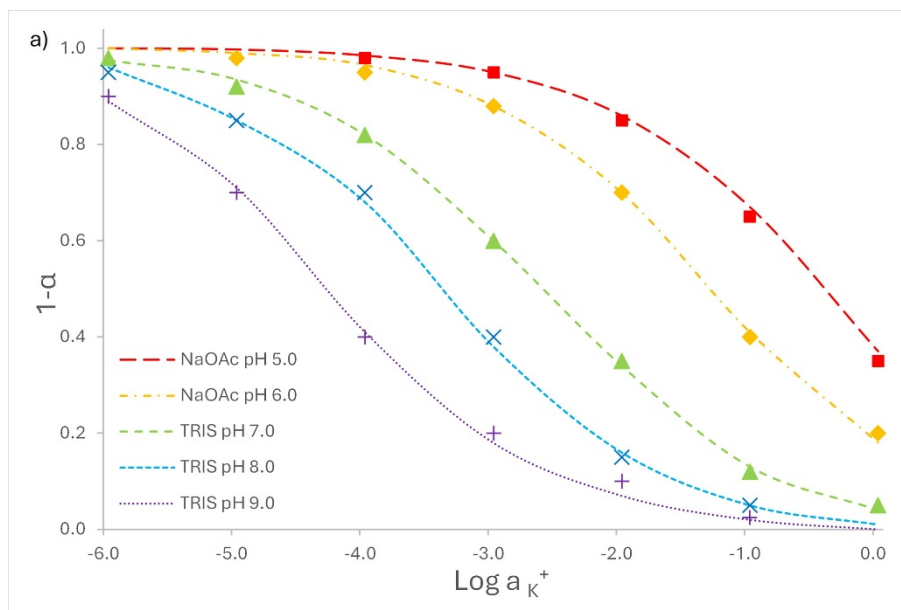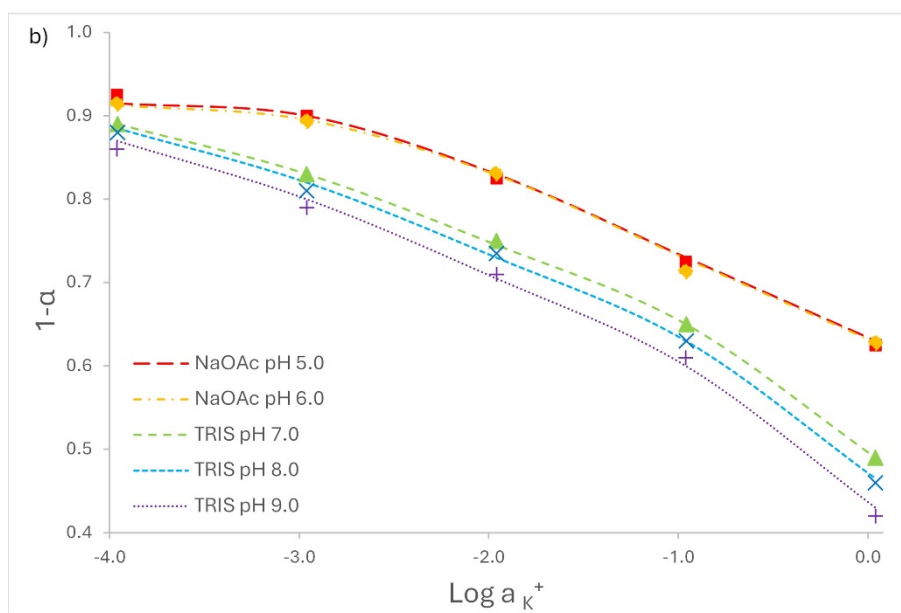

22

23 **Figure S6.** Sigmoid curve behavior at pH 5.0-9.0 for (a) BO and (b) NO. Measurements  
 24 were performed in 0 20 mM TRIS-HCl buffer and 20 mM acetate-acetic buffer.

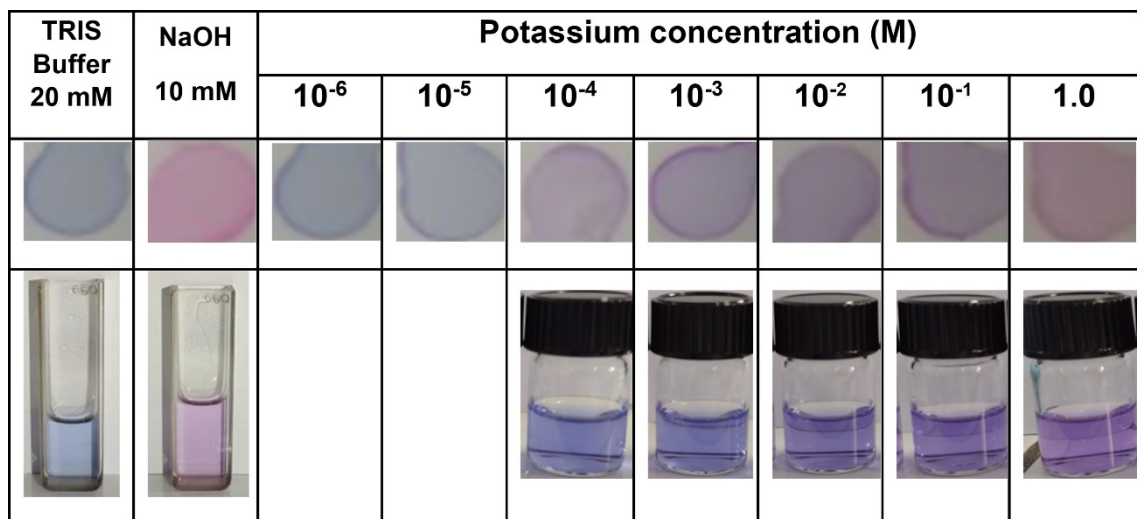

25

26 **Figure S7.** Photographs of BO (top) and NO (bottom) for different concentrations of K<sup>+</sup>  
 27 in 20 mM TRIS buffer at pH 7.0.

28 **Table S1.** The logarithm of the selectivity coefficients of the optodes for potassium ions  
 29 based on the valinomycin ionophore against interfering ions.

| <i>Log K<sup>+</sup> - j<sup>+</sup></i> |                 |                 |                  |                  |
|------------------------------------------|-----------------|-----------------|------------------|------------------|
| j = interferer                           | Na <sup>+</sup> | Li <sup>+</sup> | Ca <sup>2+</sup> | Mg <sup>2+</sup> |
| Bulk optode                              | 1.79            | 3.45            | 2.09             | 2.20             |
| Nano optode                              | 3.04            | 3.21            | 4.01             | 4.20             |

30 **Table S2.** Publications of potassium optical sensors

| Methodology       | Signal                 | Selective agent K <sup>+</sup> | Ion exchanger | Optical agent | Support                 | Type of sample    | Limit of detection       |
|-------------------|------------------------|--------------------------------|---------------|---------------|-------------------------|-------------------|--------------------------|
| ISO (this work)   | Colorimetric           | Valinomycin                    | K-TCPB        | CHI           | BO: PVC - DOS NO: F-127 | -                 | BO: 1.0 μM<br>NO: 0.1 mM |
| CQD <sup>71</sup> | Fluorescence quenching | CQD                            | -             | CQD           | Gelatin powder          | Human blood serum | 0.01 mM                  |
| POD <sup>70</sup> | Colorimetric           | Valinomycin                    | K-TCPB        | CHI           | Paper substrate         | -                 | 0.1 mM                   |
| ISO <sup>72</sup> | Colorimetric           | Valinomycin                    | DOP           | CHI           | PVC                     | Blood plasma      | 2.3 mM                   |

|                                             |              |             |         |            |                                               |                         |                          |
|---------------------------------------------|--------------|-------------|---------|------------|-----------------------------------------------|-------------------------|--------------------------|
| Polyoctylthiophene nanoptodes <sup>66</sup> | Fluorescence | Valinomycin | Na-TFPB | CHI        | POT - PVA - DOS                               | Bovine serum album      | 1.0 · 10 <sup>-6</sup> M |
| ISO <sup>67</sup>                           | Fluorescence | Valinomycin | Na-TFPB | SDI - SDII | Nylon membrane                                | Aqueous sample solution | 1.0 μM                   |
| POD <sup>68</sup>                           | Colorimetric | Valinomycin | BARF    | CHI        | F-127 - DOS                                   | Biological fluids       | 2.0 mM                   |
| ISO <sup>69</sup>                           | Colorimetric | Valinomycin | Na-TFPB | CHI        | F-127 - Agarose                               | -                       | 0 - 2.0 mM               |
| ISO <sup>41</sup>                           | Fluorescence | Valinomycin | Na-TFPB | SD         | Organosilica nanospheres - nylon filter paper | Aqueous sample solution | 1.0 μM                   |

### 31 Method of least-squares for calculated the Ke

32 The equilibrium constant of the valinomycin-potassium ion complex ( $K_e^{KI^+}$ ) could be  
33 expressed as Equation S1.

$$34 \quad \text{Log} \left( \frac{a_{K^+}}{a_{H^+}} \right) + \text{Log} K_e^{KI^+} = \text{Log} \left( \frac{\alpha}{(1-\alpha)} \frac{[C_E] - (1-\alpha)[C_C]}{[C_I] - [C_E] + (1-\alpha)[C_C]} \right)$$

35 Equation S1

36 If we defined  $\text{Log} \left( \frac{a_{K^+}}{a_{H^+}} \right) = X_i$ ;  $\text{Log} K_e^{KI^+} = C$  and

37  $\frac{\alpha}{(1-\alpha)} \frac{[C_E] - (1-\alpha)[C_C]}{[C_I] - [C_E] + (1-\alpha)[C_C]} = Y_i$ . A simple way to find C is to average the

38 distances between Xi and Yi as an Equation S2.

$$39 \quad C = \frac{\sum (Y_i - X_i)}{n} \quad \text{Equation S2}$$

40

41

42
